# Supplementary material for: Influência do Consumo de Suco de Laranja (Citrus Sinensis) na Remodelação Cardíaca de Ratos Submetidos a Infarto do Miocárdio
Source: PubMed Central journal article supplement (PMC8288524; doi:10.36660/abc.20190397), 2021-06-08
Supplement: 2019-0397-material-suplementar.pdf [file 2019-0397-material-suplementar.pdf]

## Supplemental file

Nutrition information and compound determination of orange juice.

| <b>Portion: 200 mL (1 cup)</b>               |                                  | % DV* |
|----------------------------------------------|----------------------------------|-------|
| kcal = kJ                                    |                                  |       |
| Energetic value                              | 86 kcal = 365 kJ                 | 4.3   |
| Carbohydrate                                 | 20 g                             | 6.7   |
| Protein                                      | 1.5 g                            | 2.0   |
| Total fat                                    | 0 g                              | 0     |
| Saturated fat                                | 0 g                              | 0     |
| Trans fats                                   | 0 g                              |       |
| Food fiber                                   | 0 g                              | 0     |
| Sodium                                       | 0 mg                             | 0     |
| Calcium                                      | 20 mg                            | 2.0   |
| Magnesium                                    | 9 mg                             | 1.4   |
| Phosphor                                     | 24 mg                            |       |
| Potassium                                    | 174 mg                           |       |
| Iron                                         | 0.2 mg                           | 1.4   |
| Copper                                       | 0.04 mg                          |       |
| Vitamin C                                    | 64 mg                            | 142   |
| Folic acid                                   | 58 mg                            | 14    |
| Total phenolic compounds                     | 85.8±1.2 <sup>a</sup> mg/100 mL  |       |
| Antioxidant activity                         | 7.14±0.29 <sup>a</sup> DPPH/L    |       |
| Ascorbic acid                                | 60.1±1.80 <sup>a</sup> mg/100 mL |       |
| Total carotenoids expressed as beta carotene | 136±8.0 <sup>a</sup> µg/100 mL   |       |

\* Daily reference values based on 2000 kcal or 8400 kJ diet.

<sup>a</sup> Values presented as mean ± SD

**Table 1.** Initial echocardiographic study.

| <b>Variable</b>                   | <b>IM (n = 40)</b> | <b>IOJ (n = 40)</b> | <b>P</b> |
|-----------------------------------|--------------------|---------------------|----------|
| Systolic area (mm <sup>2</sup> )  | 38.7±14.3          | 36.3±13.5           | 0.446    |
| Diastolic area (mm <sup>2</sup> ) | 58.7±12.7          | 55.3±12.2           | 0.225    |
| Initial infarction size (%)       | 40.8±7.40          | 44.8±12.5           | 0.085    |

Data are expressed as mean ± standard deviation. I: infarcted animals; M: animals that received maltodextrin; OJ: animals that received orange juice. *p*: value of Student's *t*-test.

**Table 2.** Final echocardiogram analysis.

| Variable                         | SM<br>(n = 19)         | SOJ<br>(n = 20)        | IM<br>(n = 9)           | IOJ<br>(n = 9)          | P<br>(I)         | P<br>(OJ)        | P<br>(I×OJ)  |
|----------------------------------|------------------------|------------------------|-------------------------|-------------------------|------------------|------------------|--------------|
| PWT/BW<br>(mm/kg)                | 3.46±0.39              | 3.38±0.45              | 3.75±0.30               | 3.78±0.30               | <b>0.007</b>     | 0.832            | 0.661        |
| ISWT/BW<br>(mm/kg)               | 3.64±0.39              | 3.52±0.45              | 3.01±0.30               | 2.98±0.30               | <b>&lt;0.001</b> | 0.557            | 0.767        |
| LA/BW<br>(mm/kg)                 | 10.9±1.31              | 9.71±1.34              | 14.7±1.50               | 11.7±1.50               | <b>&lt;0.001</b> | <b>&lt;0.001</b> | 0.05         |
| HR<br>(bpm)                      | 290±30.9               | 296±34.9 <sup>B</sup>  | 268±26.7 <sup>a</sup>   | 324±3.00 <sup>aB</sup>  | 0.756            | 0.001            | <b>0.009</b> |
| FS<br>(%)                        | 58.1±2.62              | 59.9±4.02              | 31.8±5.40               | 36.8±9.00               | <b>&lt;0.004</b> | 0.129            | 0.181        |
| EF<br>(%)                        | 92.5±1.31              | 93.4±1.79              | 67.8±7.50               | 73.4±10.8               | <b>&lt;0.001</b> | 0.179            | 0.219        |
| Tei index                        | 0.51±0.13              | 0.45±0.13              | 0.75±0.12               | 0.71±0.12               | <b>&lt;0.001</b> | 0.184            | 0.891        |
| E/A                              | 1.62±0.26              | 1.56±0.18              | 2.58±1.20               | 1.81±1.50               | <b>&lt;0.001</b> | 0.456            | 0.310        |
| EDT<br>(m/s)                     | 47.0±4.79              | 46.8±4.03              | 41.6±10.8 <sup>a</sup>  | 43.1±10.5 <sup>a</sup>  | <b>0.028</b>     | 0.759            | 0.684        |
| IRT/RR <sup>0.5</sup><br>(ms)    | 47.0±7.41              | 47.0±4.47 <sup>B</sup> | 55.6±18.9 <sup>a</sup>  | 75.7±16.5 <sup>aB</sup> | <0.001           | <0.002           | <b>0.003</b> |
| S septal<br>(cm/s)               | 5.68±0.39 <sup>A</sup> | 5.79±0.40 <sup>B</sup> | 4.10±0.30 <sup>Aa</sup> | 4.76±0.30 <sup>aB</sup> | <0.001           | 0.002            | <b>0.022</b> |
| S lateral<br>(cm/s) <sup>#</sup> | 5.87±0.44              | 5.86±0.40              | 5.11±0.30               | 5.25±0.30               | <b>&lt;0.001</b> | 0.953            | 0.459        |
| A' septal<br>(cm/s)              | 3.90±0.44              | 4.27±0.44              | 4.85±1.20               | 6.47±2.10               | <b>&lt;0.001</b> | <b>0.003</b>     | 0.057        |
| A' lateral<br>(cm/s)             | 3.45±0.44              | 3.76±0.44              | 4.23±0.90               | 4.63±1.20               | <b>&lt;0.001</b> | 0.117            | 0.835        |
| E' septal<br>(cm/s) <sup>*</sup> | 8.72±11.8              | 6.17±0.44              | 4.40±0.60               | 4.94±0.60               | <b>&lt;0.001</b> | 0.207            | 0.158        |
| E' lateral<br>(cm/s)             | 5.33±0.44              | 5.47±0.44              | 4.07±0.90               | 4.61±0.90               | <b>&lt;0.001</b> | 0.145            | 0.389        |

Data are expressed as mean ± standard deviation. n: numbers of animals included in each experimental group. SM: sham animals with maltodextrin intake; SOJ: sham animals with orange juice intake; IM: infarcted animals with maltodextrin intake; IOJ: infarcted animals with orange juice intake. BW: body weight; PWT: LV posterior wall thickness; ISWT: interventricle septum wall thickness; LA: left atrium diameter; HR: heart rate; FS: endocardial fractional shortening; EF: ejection fraction; Tei index: myocardial performance index; E/A: e wave and A wave ratio; EDT: E wave deceleration time; IRT/RR<sup>0.5</sup>: isovolumetric relaxation time adjusted by heart rate; S': systolic annular mitral velocity septal and lateral; A' and E' diastolic annular mitral velocity septal and lateral (E': early and A': late). pI: p value of infarct effect. pOJ: p value of orange juice intake effect. pI×OJ: p value of interaction. Bold numbers represent the significant effects that were considered. <sup>a</sup>: IM≠IOJ; <sup>b</sup>: SM≠SOJ; <sup>A</sup>: SM≠IM e <sup>B</sup>: SOJ≠IOJ.

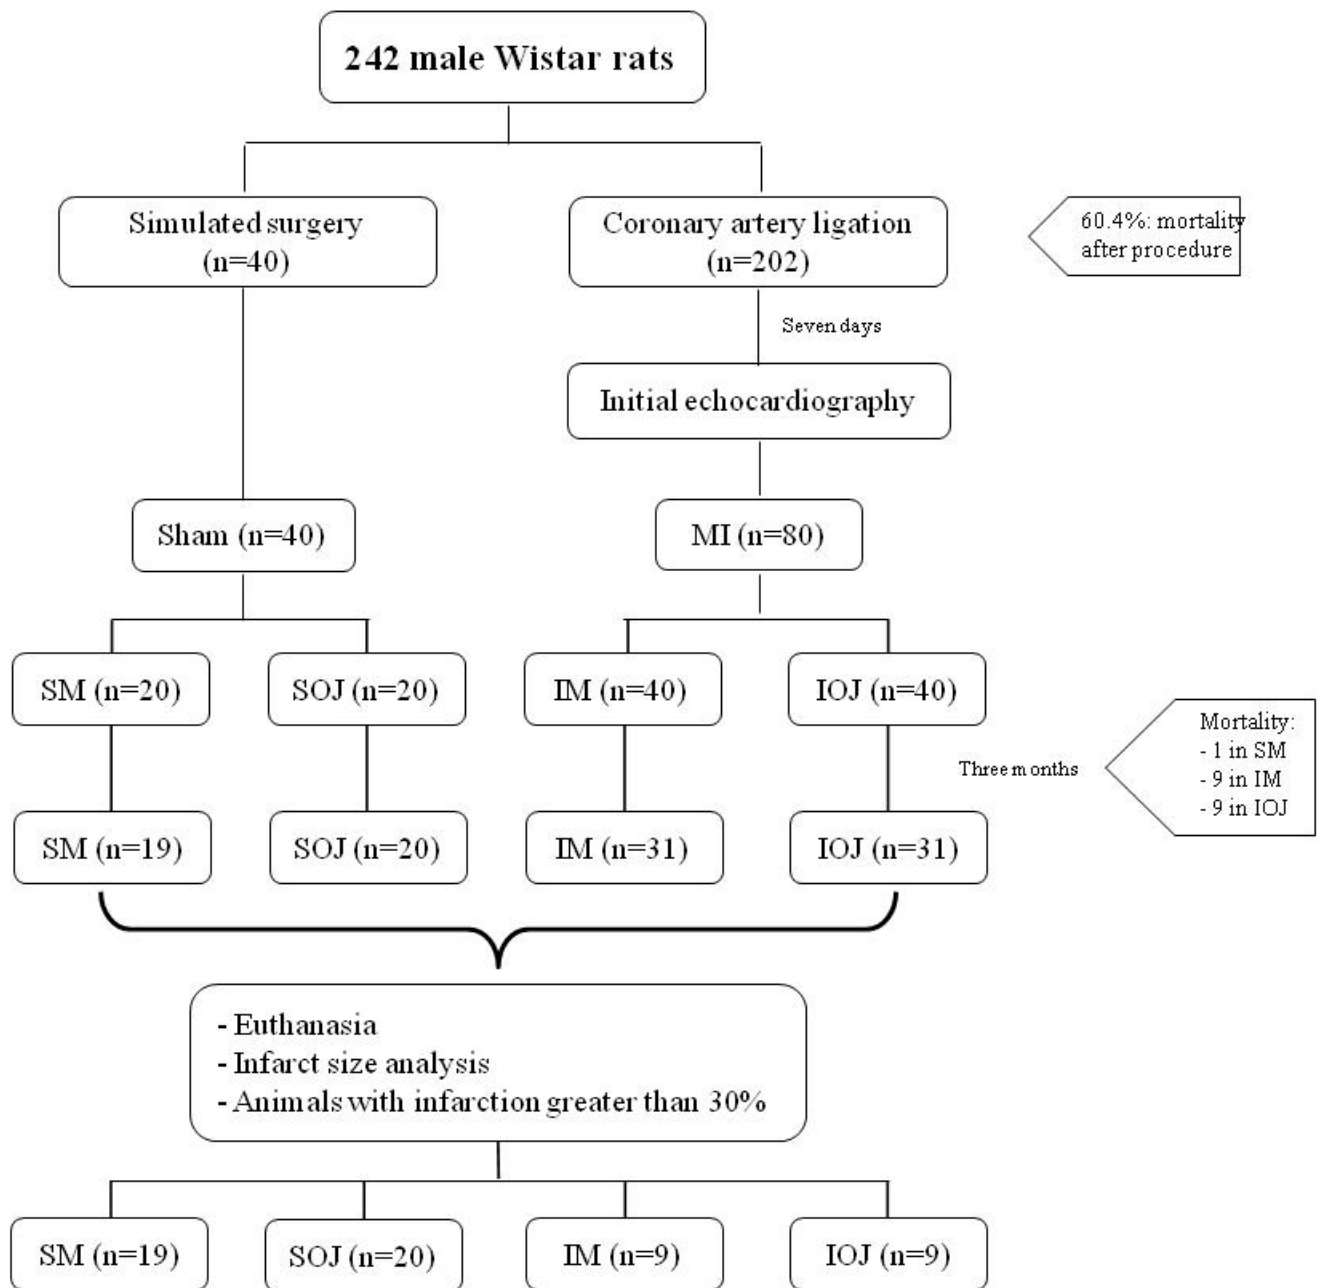

**Figure 1.** Study design, experimental groups, number of animals, mortality, and infarct size.

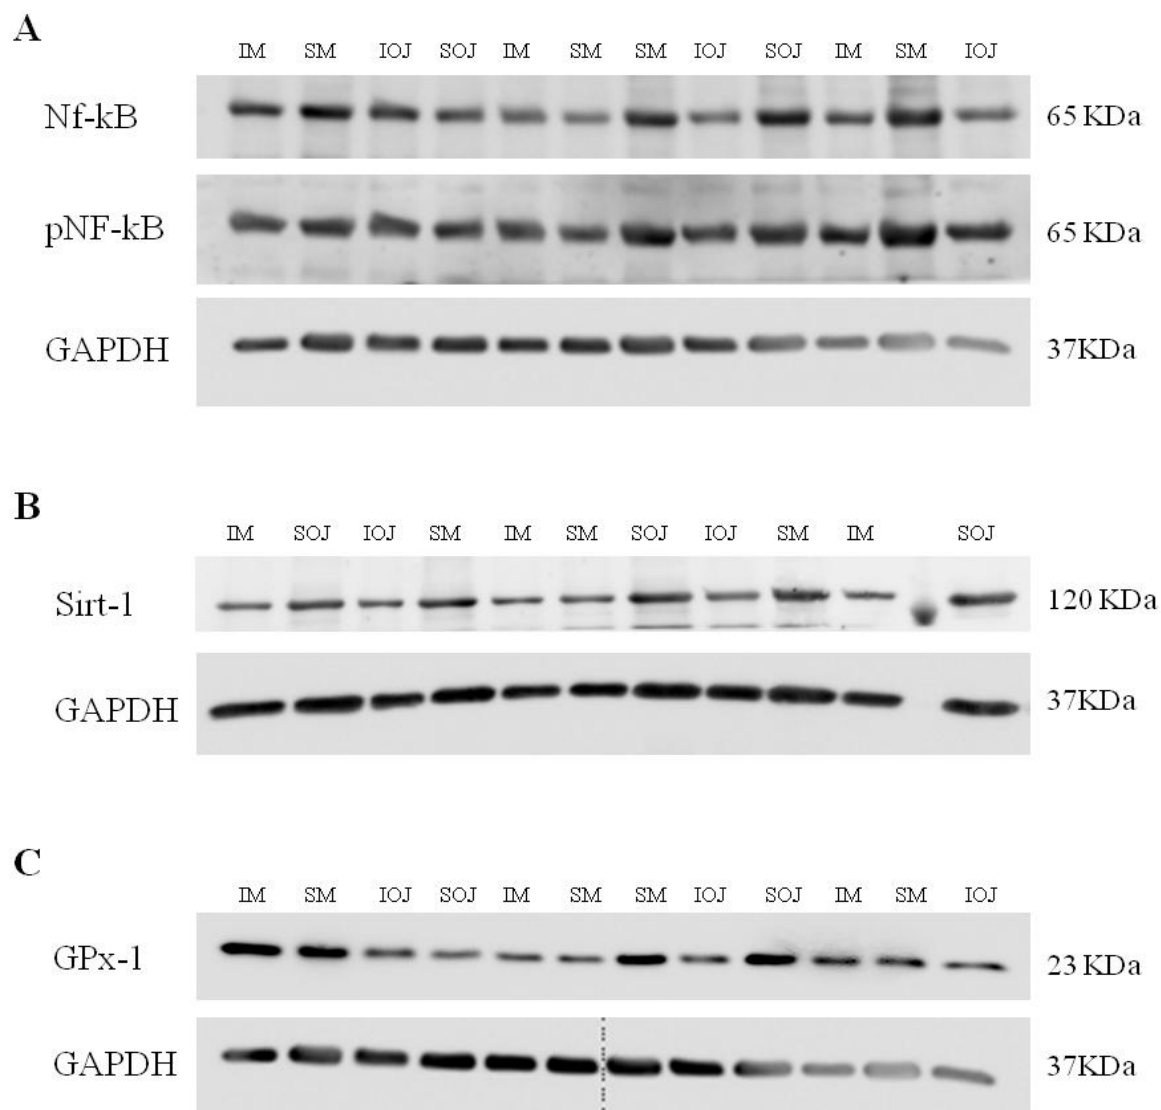

**Figure 2. Nf-kB, pNF-kB, Sirt-1 and GPx-1 representative Western blot in sham and infarcted rats.**

(A) Nf-kB and pNF-kB representative Western blot. (B) Sirt-1 representative Western blot. (C) GPX-1 representative Western blot. NF-kB: total nuclear factor-kB; pNF-kB: phosphorylated nuclear factor-kB; Sirt-1: sirtuin-1; GPx-1: glutathione peroxidase-1.
